# Supplementary material for: Health professionals’ perceptions about their clinical performance and the influence of audit and feedback on their intentions to improve practice: a theory-based study in Dutch intensive care units
Source: PubMed Central journal article supplement (PMC5816547; doi:10.1186/s13012-018-0727-8), 2018-02-17
Supplement: 13012_2018_727_MOESM2_ESM.pdf [file 13012_2018_727_MOESM2_ESM.pdf]

**Additional file 2.** Predefined reasons to be asked if hypotheses posed by Control Theory are violated.

| Hypothesis violation                                  | Predefined reason                                                         |
|-------------------------------------------------------|---------------------------------------------------------------------------|
| Negative self-assessment but no improvement intention | This indicator is not an important/relevant aspect of intensive care      |
|                                                       | Actions will not improve our performance score on this indicator          |
|                                                       | We lack the resources/time/knowledge to take action for this indicator    |
|                                                       | Me or my colleagues cannot be motivated to take action for this indicator |
|                                                       | The benchmark (median/top 10%) is unrealistic/unfeasible (step 2 only)    |
|                                                       | The measured performance score for our ICU is inaccurate (step 2 only)    |
| Positive self-assessment and improvement intention    | This indicator is an essential aspect of quality of intensive care        |
|                                                       | It is easy to improve our performance score on this indicator             |
|                                                       | Our performance is too low (step 2 only)                                  |
