# Supplementary material for: Health professionals’ perceptions about their clinical performance and the influence of audit and feedback on their intentions to improve practice: a theory-based study in Dutch intensive care units
Source: Implement Sci. 2018 Feb 17;13:33. doi: 10.1186/s13012-018-0727-8 (PMC5816547; doi:10.1186/s13012-018-0727-8)
Supplement: Supplementary file 1 — Screenshot dashboard (translated from Dutch). (PDF 137 kb) [file 13012_2018_727_MOESM1_ESM.pdf]

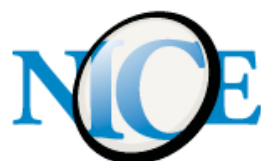

## Dashboard actionable indicators

[NICE foundation website](#) [NICE Online](#) [Data dictionary](#) [Data uploads](#) [Help](#) [username/logout](#)

Pain

Blood

Antibiotics

Ventilation

Action plan overview →

| Quality indicator                                                 | Own ICU ? | Median ? | Top 10% ? | Target ? | Actions |
|-------------------------------------------------------------------|-----------|----------|-----------|----------|---------|
| Performing pain measurements each shift                           | 89,0% ✓   | 67,0%    | 90,1%     | 100,0% ✎ | 0       |
| Acceptable pain scores                                            | 76,2% !   | 85,0%    | 90,9%     | 80,0% ✎  | 0       |
| Repeating pain measurements with unacceptable score within 1 hour | 44,9% ✓   | 13,0%    | 55,2%     | 100,0% ✎ | 2       |
| Unacceptable pain scores normalised within 1 hour                 | 36,6% ✓   | 9,2%     | 29,0%     | 60,0% ✎  | 0       |

Details

Patients

Info

Action plan

### Average performance in most recent 3 months: ?

|                            |        |         |                 |
|----------------------------|--------|---------|-----------------|
| Own ICU                    | Median | Top 10% | Previous period |
| 89,0% ✓ (good performance) | 67,0%  | 90,1%   | -0,1%           |

### Performance over time:

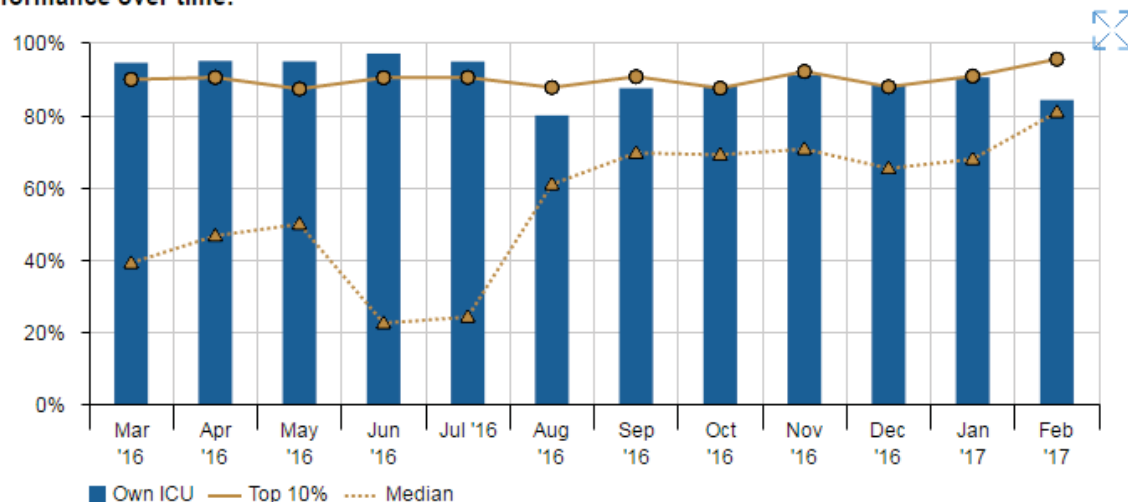

### Operationalisation:

Patient shifts during which pain was measured at least once.

### Period:

1 December 2016 t/m 28 February 2017

### Population in this period:

Own ICU: 180 admissions  
All ICUs: 3840 admissions in 12 ICUs

### Colour thresholds based on all ICUs: ?

- ✓ 81,1% - 100,0% Good performance
- ✓ 60,3% - 81,1% Room for improvement
- ! 0,0% - 60,3% Improvement recommended

### Actions:

0 actions in progress  
0 actions implemented
